# Supplementary material
Source: MDPI journal article supplement (https://www.mdpi.com/2624-781X/4/1/1)
Supplement: s1 [file s1 › reactions-2047885-supplementary.pdf]

## Supplementary Information

Figure S1. SEM Micrographs VOx – NU

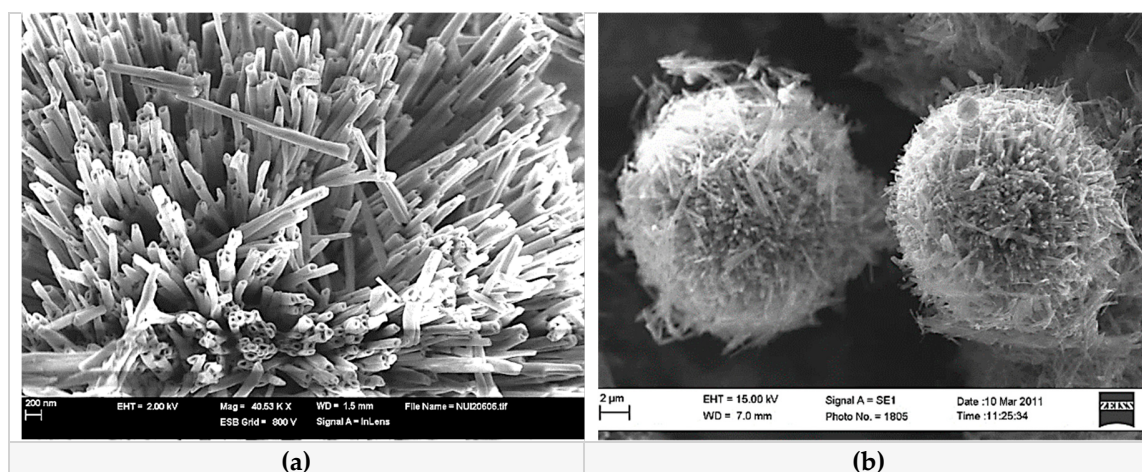

**Figure S1.** SEM micrographs of vanadium oxide  $(\text{C}_{18}\text{H}_{37}\text{NH}_3)_2\text{V}_7\text{O}_{16}$  high-density VOx-NTs radial array spherical clusters (nanourchins, VOx-NU): (a) VOx-NTs radial array from the urchin surface; (b) isolated urchins spherical clusters.

Figure S2. SEM Micrographs VOx-MC

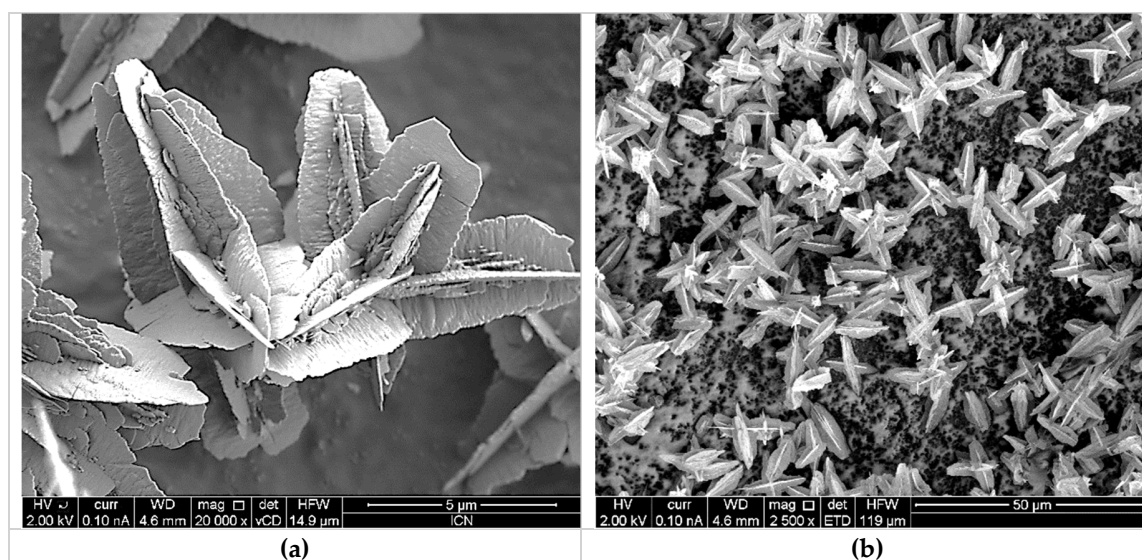

**Figure S2.** SEM micrographs of vanadium oxide  $\text{VO}_2$  micro-crosses (VOx-MC): (a) detailed VOx-MC  $\text{VO}_2$  folds; (b) long scan clustered micro-crosses.

Figure S3. TEM micrographs VOx-MC

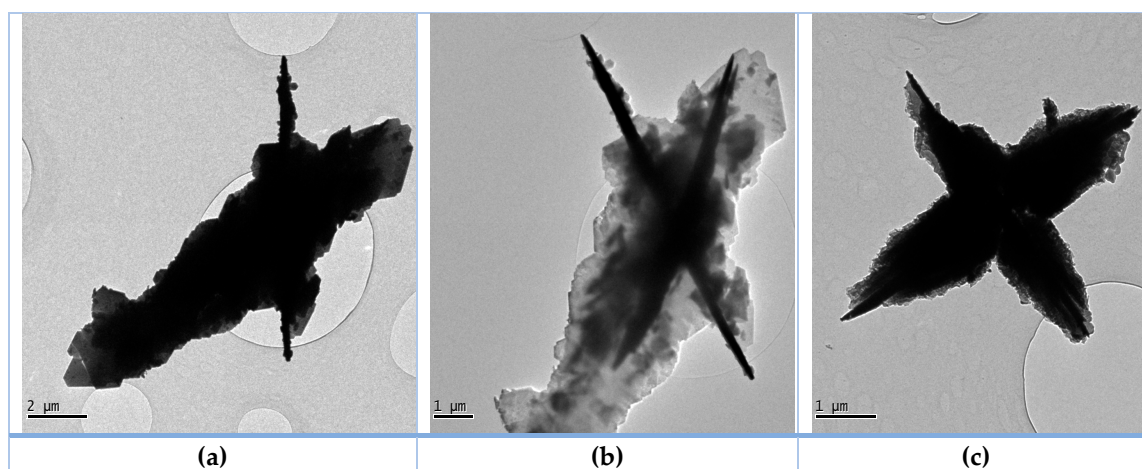

**Figure S3.** TEM micrographs of vanadium oxide VO<sub>2</sub> micro- crosses (VOx-MC): (a-b) detailed VOx-MC VO<sub>2</sub> folds; (c) isolated VOx-MC exhibiting the VO<sub>2</sub> four folds.

Figure S4. SEM Micrographs VOx-MC

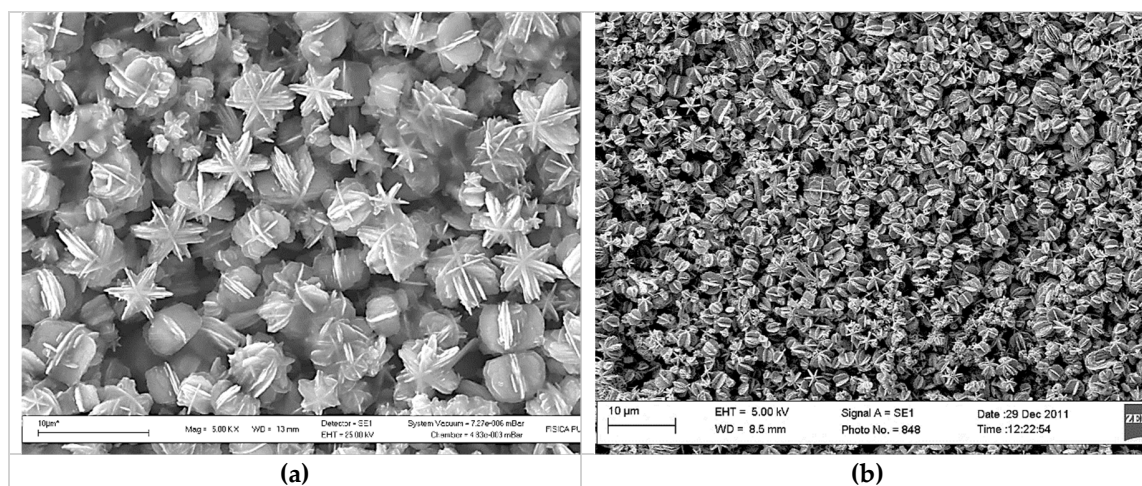

**Figure S4.** SEM micrographs of vanadium oxide V<sub>6</sub>O<sub>11</sub> rotationally symmetric six-folds (VOx-NC): (a) vanadium oxide six-folds, star-fruit morphology; (b) long scan clustered V<sub>6</sub>O<sub>11</sub> vanadium oxide six-folds.

Figure S5. SEM Micrographs of defect VO<sub>x</sub>-MSQ and VO<sub>x</sub>-NU

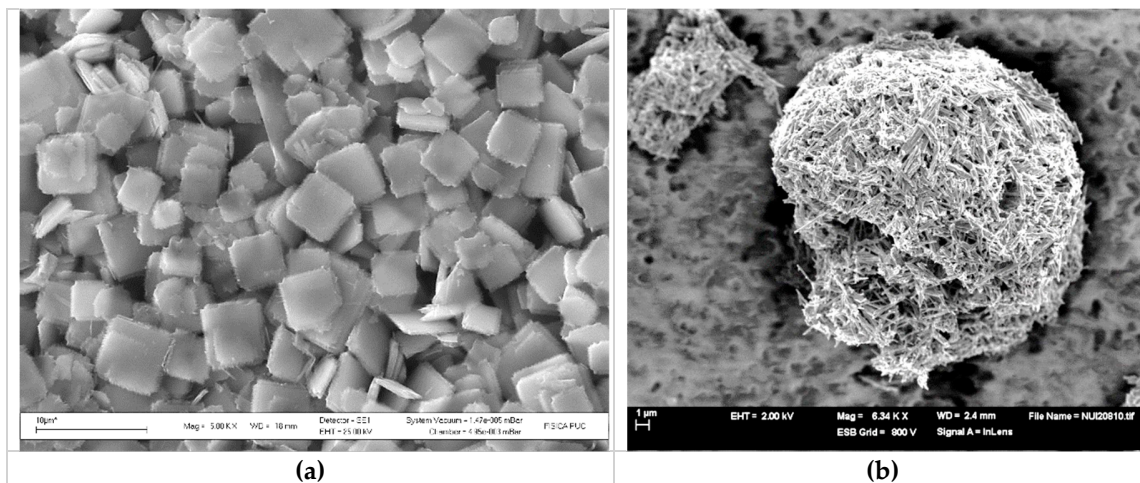

**Figure S5.** SEM micrographs of defected vanadium oxide (NH<sub>4</sub>)<sub>2</sub>V<sub>7</sub>O<sub>16</sub> micro-squares (VO<sub>x</sub>-MSQ): (a) long scan of clustered and eroded VO<sub>x</sub>-MSQ featuring borders with high porosity degree; (b) cracked (C<sub>18</sub>H<sub>35</sub>NH<sub>3</sub>)<sub>2</sub>V<sub>7</sub>O<sub>16</sub> nanourchins (VO<sub>x</sub>-NU).

Figure S6. TEM Micrographs of defect VO<sub>x</sub>-MSQ

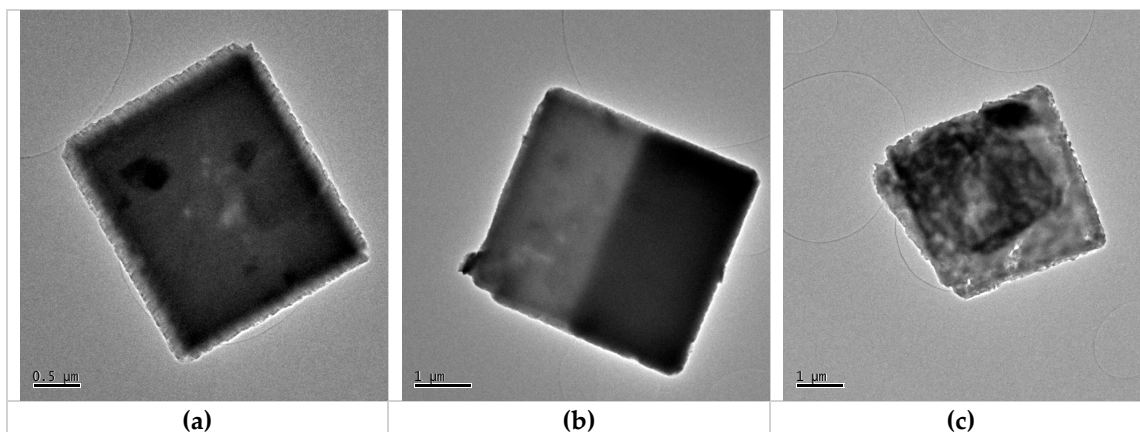

**Figure S6.** TEM micrographs of defected vanadium oxide (NH<sub>4</sub>)<sub>2</sub>V<sub>7</sub>O<sub>16</sub> micro-squares (VO<sub>x</sub>-MSQ): (a-b) isolated eroded VO<sub>x</sub>-MSQ featuring borders with high porosity degree; (c) defect rich VO<sub>x</sub>-MSQ eroded with high porosity degree.
